# 1   **Association between premorbid body mass index and** 2   **amyotrophic lateral sclerosis: causal inference** 3   **through genetic approaches**

4

5   Ping Zeng <sup>a, b</sup>, Xinghao Yu <sup>a</sup>, Haibo Xu <sup>a, \*</sup>

6

7   <sup>a</sup> Department of Epidemiology and Biostatistics, School of Public Health, Xuzhou  
8   Medical University, Xuzhou, Jiangsu, 221004, PR China

9   <sup>b</sup> Center for Medical Statistics and Data Analysis, School of Public Health, Xuzhou  
10   Medical University, Xuzhou, Jiangsu, 221004, PR China

11

12

13   Correspondence to: Haibo Xu, Department of Epidemiology and Biostatistics, School  
14   of Public Health, Xuzhou Medical University, Xuzhou, Jiangsu, 221004, PR China;  
15   Center for Medical Statistics and Data Analysis, School of Public Health, Xuzhou  
16   Medical University, Xuzhou, Jiangsu, 221004, PR China

17

18   Email address: [hbz@xzhmu.edu.cn](mailto:hbz@xzhmu.edu.cn) (H. Xu)

# 19 **ABSTRACT**

20 *Background:* Inverse association between premorbid body mass index (BMI) and  
21 amyotrophic lateral sclerosis (ALS) has been discovered in observational studies;  
22 however, whether this association is causal remains largely unknown.

23 *Methods:* We employed a two-sample Mendelian randomization approach to evaluate  
24 the causal relationship of genetically increased BMI with the risk of ALS. The  
25 analyses were implemented using summary statistics obtained for the independent  
26 instruments identified from large-scale genome-wide association studies of BMI (up  
27 to ~770,000 individuals) and ALS (up to ~81,000 individuals). The causal relationship  
28 between BMI and ALS was estimated using inverse-variance weighted methods and  
29 was further validated through extensive complementary and sensitivity analyses.

30 *Findings:* Using 1,031 instruments strongly related to BMI, the causal effect of per  
31 one standard deviation increase of BMI was estimated to be 1.04 (95% CI 0.97~1.11,  
32  $p=0.275$ ) in the European population. The null association between BMI and ALS  
33 discovered in the European population also held in the East Asian population and was  
34 robust against various modeling assumptions and outlier biases. Additionally, the  
35 Egger-regression and MR-PRESSO ruled out the possibility of horizontal pleiotropic  
36 effects of instruments.

37 *Interpretation:* Our results do not support the causal role of genetically increased or  
38 decreased BMI on the risk of ALS.

## 39 *Key words*

40 Body mass index, Amyotrophic lateral sclerosis, Mendelian randomization,  
41 Instrumental variable, Genome-wide association studies

# 1. Introduction

Amyotrophic lateral sclerosis (ALS) is a frequent adult-onset fatal neurodegenerative disease clinically characterized by rapidly progressive motor neurons degeneration and death because of respiratory failure [1]. Although great advance has been made for the understanding of ALS in the past decades, the pathogenic mechanism underlying ALS remains largely unknown and only few therapeutic options can be available [2]. It has been shown that both genetic [3, 4] and environmental factors (e.g. cigarette smoking, alcohol consumption, exposure to pesticides, lead, organic toxins or electromagnetic radiation and socioeconomic status) may contribute to the development of ALS [5, 6, 7, 8, 9, 10, 11]. However, no replicable and definitive environmental risk factors are currently well established for ALS. In addition, due to the quickly growing ageing of the population in the upcoming years, it is evaluated that the number of ALS cases across globe will increase by about 70% [12], which is anticipated to result in rather serious socioeconomic and health burden. Therefore, understanding the risk factors of ALS for improving the medical intervention and quality of life for ALS patients is considerably important from both disease treatment and public health perspectives.

Among extensive epidemiological researches of ALS, an interesting and surprising observation is that ALS patients often encounter a loss of weight or a decrease of body mass index (BMI) at the early phase of diagnosis with many possible explanations [1, 13, 14, 15, 16, 17, 18, 19, 20]. Indeed, substantial change of BMI in ALS patients has been identified as an independent prognostic factor and has been linked to disease progression [13, 21, 22, 23, 24, 25, 26, 27]. For example, it is observed that a rapid reduction of BMI in ALS patients at the initial disease stage is a strong indicator of faster disease progression and shorter survival time; in contrast, nutritional intervention for ALS patients to increase BMI can prolong the survival time and leads to a delay in disease progression [28, 29, 30]. The benefit of raising BMI for ALS patients by taking high-energy diet is also confirmed by mouse models [31].

However, whether the long-term exposure to genetically increased (or decreased) BMI prior to the onset of ALS also plays a pathological role in the development of ALS is less understood. Various findings with regard to the relationship between premorbid (i.e. prediagnostic) BMI and ALS have been reported in the literature. In a

large-scale observational cohort, it was shown that higher BMI before the onset of ALS was associated with a decreased risk of ALS, resulting in an average of 4.6% [95% confidence interval (CI) 3.0~6.1%] lower risk of ALS per unit increase in BMI [23]. This inverse association between premorbid BMI and the risk (or mortality) of ALS was also supported by some recent studies [32, 33, 34, 35, 36]; see [Tables S1](#) for more information. However, contradictory results were also reported. For example, it was shown that ALS cases consistently had a greater BMI compared with controls beyond five years before ALS manifestation although they had a smaller BMI than controls within five years prior to onset; and that per unit increase of BMI can result in ~5.0% (95% CI 0.0~11.0%) higher risk of ALS ([Table S2](#) and [Fig. S1](#)) [13]. This study also implied that BMI may already begin to change about ten years before onset of ALS. A more pronounced increased risk associated with greater BMI before five years onset of ALS was observed in a population-based case-control study performed in Washington State [37, 38]: 50% higher risk of ALS for those with BMI between 24 and 26 kg/m<sup>2</sup> compared with those with BMI less than 21 kg/m<sup>2</sup>, and 70% higher risk of ALS for those with BMI between larger than 26 kg/m<sup>2</sup> compared with those with BMI less than 21 kg/m<sup>2</sup>.

The conflicting observations on the relationship between premorbid BMI and ALS may be partly due to uncontrolled/unknown bias or confounding factors that are frequent in observational studies, or partly due to the relatively small sample size for patients because of the rarity of ALS, or partly due to the reverse causality in previous studies as well as a limited retrospective time (or follow-up) before ALS onset [13]. We employ the systematic review and meta-analysis to provide a pooled conclusion about the relationship between premorbid BMI and ALS ([Supplementary Text S1](#)). We show that on average a unit increase of premorbid BMI can robustly result in about 3.0% (95% CI 2.1~4.5%) risk reduction of ALS, supporting the previous finding that a greater premorbid BMI is a protective factor for the development of ALS [23, 32, 33, 34, 35, 36]. Nevertheless, there still exists an essential problem — is the change of BMI before ALS manifestation a causal risk factor or the consequence of ALS?

Because BMI is a modifiable exposure factor and obesity is a growing global health problem [39], a better characterization of the causal effect of BMI on ALS can thus

106 facilitate our understanding of the pathogenesis of ALS and finally leads to better  
 107 prevention and treatment for ALS patients. Traditionally, randomized controlled trial  
 108 (RCT) studies are the gold standard for inferring the causal impact of exposure on  
 109 outcome. However, determining the causal relationship between premorbid BMI and  
 110 ALS through RCT is challenging and unrealistic, because RCT necessarily requires a  
 111 very large set of subjects and an extremely long follow-up before clinical manifest of  
 112 ALS due to its rarity in the population [40] and wide variations in prevalence and  
 113 incidence across various age groups [41, 42, 43, 44]. Therefore, it is desirable to  
 114 investigate the causal association between premorbid BMI and ALS through  
 115 observational studies. Mendelian randomization is such an approach [45, 46], which  
 116 employs single nucleotide polymorphisms (SNPs) as instruments for the exposure (i.e.  
 117 premorbid BMI) and assesses its causal effect on the outcome of interest (i.e. ALS)  
 118 (Fig. S2) [47]. The recent successes of large-scale genome-wide association studies  
 119 (GWASs) [48, 49, 50, 51, 52] make it feasible to choose strongly associated SNPs to  
 120 be valid instruments for causal inference in Mendelian randomization [53, 54]. Indeed,  
 121 in the last few years Mendelian randomization has become a very popular method for  
 122 causality inference in observational studies [54, 55].

123 Therefore, our main goal in this study is to examine whether there exists a causal  
 124 association between the long-term exposure to genetically increased (or decreased)  
 125 BMI and ALS onset. Consequently, SNPs which influence BMI would also affect the  
 126 risk of ALS through changes of BMI. To do so, we conducted the largest and most  
 127 comprehensive two-sample Mendelian randomization analysis to date by using  
 128 summary statistics obtained from large-scale GWASs with ~770,000 individuals for  
 129 BMI and ~21,000 ALS cases.

## 130 **2. Materials and Methods**

### 131 *2.1. GWAS data sources and instrument selection*

132 We selected 1,031 independent index association SNPs ( $p < 5.00 \times 10^{-8}$ ) to serve as  
 133 instrumental variables for BMI ([Table S3](#)) from the Genetic Investigation of  
 134 ANthropometric Traits (GIANT) consortium, which is the largest BMI GWAS (up to  
 135 773,253 individuals) for the European population to date ([Supplementary Text S2](#))  
 136 [\[50\]](#). For all the instruments we obtained their association summary statistics in terms  
 137 of the effect allele, marginal effect size estimate and standard error. To estimate the  
 138 causal effect of BMI on ALS, we extracted corresponding association summary  
 139 statistics of these index SNPs for ALS from an ALS GWAS that was also carried out  
 140 in the European population up on 80,610 individuals (20,806 cases and 59,804  
 141 controls) ([Table S3](#)) ([Supplementary Text S2](#)) [\[4\]](#).

142 Besides the set of 1,031 instruments obtained from [\[50\]](#), as a part of complementary  
 143 and sensitivity analyses, we also attempted to validate whether the relationship  
 144 between BMI and ALS derived from the European population also holds in the East  
 145 Asian population. To do so, we performed an additional Mendelian randomization  
 146 study using another set of 75 instruments obtained from an East Asian BMI GWAS up  
 147 to 158,284 individuals ([Table S4](#) and [Supplementary Text S2](#)) [\[52\]](#). The corresponding  
 148 summary statistics of ALS for these instruments were extracted from an East Asian  
 149 ALS GWAS up to 4,084 individuals (1,234 cases and 2,850 controls) ([Supplementary](#)  
 150 [Text S2](#)) [\[56\]](#). The two sets of index SNPs of BMI from the two populations share  
 151 only one common instrument (i.e. rs7903146). The GWAS data sets used in the  
 152 present study are summarized in [Table 1](#).

### 153 *2.2. Estimation of causal effect with inverse-variance weighted methods*

154 To examine whether the instruments are strong, for each index SNP that was used as  
 155 instrument in turn, we calculated the proportion of phenotypic variance of BMI  
 156 explained (PVE) by the instrument using summary statistics [\[57\]](#) and generated the  $F$   
 157 statistic ([Table S3](#)) [\[58, 59\]](#). We then performed the two-sample Mendelian  
 158 randomization analysis [\[60, 61\]](#) to estimate the causal effect of BMI on ALS in terms  
 159 of OR per standard deviation (SD) change in BMI with inverse-variance weighted  
 160 (IVW) methods [\[59, 62\]](#). Before formal analysis, to ensure the validity of Mendelian

161 randomization analysis, we examined the pleiotropic associations of instruments by  
 162 removing those that may be associated with ALS with a marginal p value below 0.05  
 163 after Bonferroni correction. While in our analysis no instruments were excluded from  
 164 any set of instruments by this strategy.

### 165 *2.3. Complementary and sensitivity analyses*

166 To ensure results robustness and guard against model assumptions in the Mendelian  
 167 randomization analysis ([Fig. S2](#)), we carried out a series of complementary and  
 168 sensitivity analyses: (i) leave-one-out (LOO) cross-validation analysis [63] and  
 169 Mendelian Randomization Pleiotropy RESidual Sum and Outlier (MR-PRESSO)  
 170 analysis [64] to validate whether there are instrumental outliers that can substantially  
 171 influence the causal effect estimate; (ii) weighted median-based method that is robust  
 172 when some instruments are invalid [65]; (iii) MR-Egger regression to examine the  
 173 assumption of directional pleiotropic effects [61, 66]; (iv) IVW causal analysis after  
 174 removing instruments that may be correlated to other 38 complex metabolic,  
 175 anthropometric and socioeconomic traits from large-scale GWASs ([Supplementary](#)  
 176 [Text S2](#)); (v) reverse causal inference on BMI using ALS instruments; (vi) IVW  
 177 method for the causal effect estimation of BMI on ALS in the East Asian population.

# 3. Results

## 3.1. Causal effect of BMI on ALS

By using the PLINK procedure ([Supplementary Text S2](#)), we selected 1,031 independent SNPs to be valid instruments for BMI in the European population from the GIANT study [50] ([Table S3](#)). These instruments together explain a total of 8.28% of phenotypic variance for BMI. The  $F$  statistics for all these SNPs are above 10 (ranging from 28.8 to 1426.2 with an average of 58.4), implying that the weak instrument is less likely to bias our analysis. In addition, as there is significantly statistical evidence for the heterogeneity of causal effect across instruments ( $p=7.43E-4$ ); therefore, only the results estimated using the random-effects IVW method are displayed in the following paragraphs.

With the random-effects IVW method we find that the OR of ALS per unit [one standard deviation (SD)] increase of BMI is estimated to be 1.04 (95% CI 0.97~1.11,  $p=0.275$ ) using the set of 1,031 instruments, suggesting that the genetically changed BMI is not necessarily causally associated with an increased or decreased risk of ALS. We further examine whether the lack of detectable non-zero causal effect of BMI on ALS is due to a lack of statistical power. To do so, we calculated the statistical power to detect an OR ratio of 1.10 (or 0.90) in the risk of ALS per unit change of BMI following the analytic-form approach given in [67] (<https://cnsngenomics.shinyapps.io/mRnd/>). It is shown that the estimated statistical power is 94%, indicating that we would have reasonably high power to detect such a causal effect of BMI on ALS if BMI is indeed causally related to the risk of ALS.

## 3.2. Sensitivity analyses to validate the estimated causal effect of BMI on ALS

We now validate the causal effect of BMI on ALS estimated above through various sensitivity analyses. First, we examine whether there exist potential instrument outliers and whether these outliers have a substantial influence on the estimate of causal effect. To do so, we created a scatter plot by drawing the effect sizes of BMI with regard to their effect sizes of ALS for all the 1,031 instruments. Among all the instruments, one index SNP (i.e. rs2229616) has the largest effect size of 0.106 on BMI and can be reasonably assumed to be a potential outlier ([Fig. 1](#)). However, this outlier does not impact the estimated causal effect in our Mendelian randomization



analysis. Specially, after removing rs2229616, the OR of ALS per one SD increase of BMI is 1.04 (95% CI 0.97~1.11,  $p=0.317$ ), almost the same as that obtained using all the instruments. To further examine whether a single instrument may strongly influence the causal effect of BMI on ALS, we performed a leave-one-out (LOO) Mendelian randomization analysis. Again, the LOO analysis results show that no single instrument can influence the causal effect estimate substantially (Fig. 2). Additionally, we also directly tested whether any instrument is an outlier using MR-PRESSO [64], which shows that no significant instrument outliers exist for the Mendelian randomization analysis at the significance level of 0.05.

To study whether some are invalid among the set of 1,031 instruments and may bias the results, we conducted a Mendelian randomization analysis using the weighted median method [65]. The weighted median method yields the consistent estimate as before. In particular, the OR of ALS per one SD increase of BMI is calculated to be 1.01 (95% CI 0.91~1.13,  $p=0.806$ ), suggesting that invalid instruments unlikely bias our results.

To investigate whether these instruments show potentially horizontal pleiotropy, we performed a Mendelian randomization analysis using the MR-Egger regression [61, 66]. The results from the MR-Egger regression analysis are again largely consistent with our main results. For example, using all the 1,031 instruments the MR-Egger estimates the OR per one SD increase of BMI on ALS to be 0.97 (95% CI 0.79~1.19,  $p=0.740$ ). The MR-Egger regression intercept is 0.001 (95% CI -0.002~0.004,  $p=0.473$ ). Furthermore, funnel plots also display a symmetric pattern around the causal effect point estimate (Fig. 3). The funnel plots and MR-Egger regression results together offer no evidence for horizontal pleiotropy.

We further performed causal estimation for BMI after removing instruments that may be potentially associated with other 38 complex traits (Supplementary Text S2) with various threshold values. Again, the resulting estimates of causal effect for BMI on ALS are not statistically significant regardless of the thresholds used, consistent with the results obtained with all the instruments (Table S5). The Mendelian randomization analysis using ALS instruments also removes the likelihood of reverse causality (the causal effect size is -0.011 with 95% CI -0.034~0.011 and  $p=0.317$ ).

240 Finally, we estimated the causal effect of BMI on ALS in the East Asian population.  
 241 To do so, we first obtained a set of 75 BMI-associated SNPs to serve as instruments  
 242 (Tables S4). The estimated PVE by these instruments is 2.59%, and all have an  $F$   
 243 statistic above 10 (range from 22.6 to 410.1 with an average of 56.8) and are thus  
 244 deemed as strong instruments [58, 59]. With these identified instruments, again we  
 245 find that genetically higher BMI is not causally associated with an increased or  
 246 decreased risk of ALS at the significance level of 0.05. Specifically, the OR of ALS  
 247 per one SD increase of BMI is estimated to be 0.90 (95% CI 0.59~1.39,  $p=0.647$ ).

## 248 Discussion

249 The main objective of our study was to dissect whether there has a causal association  
 250 between premorbid BMI and ALS and to investigate whether genetic predisposition to  
 251 BMI plays an etiological role in ALS. To achieve this, in the present paper we have  
 252 implemented a comprehensive Mendelian randomization analysis using summary  
 253 statistics from GWASs. To our knowledge, this is the first Mendelian randomization  
 254 study to explore the relationship between BMI prior to disease onset and ALS by  
 255 leveraging genetic information from large scale GWASs. Additionally, as little has  
 256 been known about the casual factors for the development of ALS to data[2]; therefore,  
 257 our study contributes considerably to research on the role of premorbid BMI with  
 258 regard to the risk of ALS and has the potential implication in public health.

259 Although previous epidemiological studies showed evidence that premorbid BMI may  
 260 have a neuroprotective role on ALS ([Supplementary Text S1](#)) [32, 33, 34, 35, 36, 37,  
 261 38], our Mendelian randomization analysis does not support the existence of causal  
 262 association between premorbid BMI and the risk of ALS. Besides finding the null  
 263 causal relationship between BMI and ALS in the European population, we also  
 264 validated that the causal association does not hold in the East Asian population and  
 265 that the failure of identifying non-zero causal effect of BMI on ALS is not possibly  
 266 due to the lack of statistical power in the European population.

267 Unlike the results of observational studies which can be easily biased by measurement  
 268 errors and confounding factors (e.g. cigarette smoking, alcohol drinking or daily diet  
 269 intakes; and it indeed has been shown that BMI is no longer associated with ALS after  
 270 controlling for socioeconomic status, prior chronic obstructive pulmonary disease,  
 271 marital status, diabetes and residence at ALS diagnosis [68]), the results of Mendelian  
 272 randomization analysis are often not susceptible to the measurement error bias  
 273 because SNPs can be sequenced accurately [69], and are also less susceptible to  
 274 reverse causation and confounders compared to other study designs because  
 275 Mendelian randomization uses the principle that the random meiotic assortment of  
 276 genotypes is independent of confounders and disease process of ALS. Additionally,  
 277 one of the strengths of this study is that the GWAS data sets with large sample sizes  
 278 (up to ~770,000 for BMI [50] and ~81,000 for ALS [4]) that were employed in our  
 279 analyses ensures sufficient statistical power and thus the Mendelian randomization

280 results are reasonably believable.

281 It needs to emphasize that in the main Mendelian randomization analysis we  
 282 employed multiple uncorrelated strongly relevant instrument variables (a total of  
 283 1,031) for causality inference of BMI on ALS. The benefit of applying multiple  
 284 instruments in Mendelian randomization analysis is that the possibility of weak  
 285 instruments bias is less likely and the high statistical power is guaranteed. However, it  
 286 also has a higher likelihood to incorporate pleiotropic instruments, which violates the  
 287 assumptions of Mendelian randomization analysis (Fig. S2) [47, 53, 54]. Therefore, to  
 288 minimize the possibility of pleiotropy, we have tried to remove pleiotropic  
 289 instruments. In addition, we also carried out sensitivity analyses by excluding  
 290 instruments that may be associated with other 31 complex phenotypes which may link  
 291 to ALS in a metabolic, anthropometric or socioeconomic way and possibly mediate  
 292 the effect of BMI on ALS. Our Mendelian randomization analysis showed that the  
 293 results are robust against pleiotropy and mediation effects as well as various model  
 294 assumptions.

295 The mechanisms underlying the causal associations between BMI and ALS may be  
 296 considerably complex. Although no statistically significant evidence that BMI  
 297 influences ALS was found in the direct biological pathway in our study, we cannot  
 298 exclude the probability that BMI can have an impact on ALS via other indirect  
 299 pathway. For example, it has been extensively shown that BMI is linked to many  
 300 cardiovascular risk factors (e.g. hypertension and dyslipidemia) and metabolic  
 301 phenotypes (e.g. type II diabetes, glucose and insulin levels), which in turn have been  
 302 found to be protective in the development of ALS [70, 71, 72, 73, 74]. The underlying  
 303 mechanism may be that higher BMI is typically associated with higher blood lipid or  
 304 glucose levels [39], which could resist against the increased energy consumption and  
 305 hypermetabolism of ALS patients and thus reduce the hypermetabolic damage on the  
 306 motor neuron system [17], potentially delaying ALS onset and increasing the survival  
 307 time [20, 28, 29, 30, 75]. As another explanation, higher BMI was also reported to be  
 308 associated with higher concentrations of progranulin [76] which could mediate the  
 309 fat-induced insulin resistance and revert mutant TDP-43 (TAR DNA-binding protein  
 310 43) induced axonopathy when overexpression [77], while TDP-43 is widely known to  
 311 link to the increasing risk of ALS [2]. Therefore, we presume that the observed

312 associations between premorbid BMI and ALS risk in those previous studies could be  
313 attributed to the consequence of some unknown biological pleiotropy.

314 Some limitations of this study should be considered. First, similar to other Mendelian  
315 randomization studies, we acknowledge that the validity of our Mendelian  
316 randomization relies on some crucial modeling assumptions (Fig. S2) [47, 53, 54],  
317 some of which cannot be possible to be fully tested for in the framework of  
318 summary-data based Mendelian randomization. Thus, we emphasize that the results  
319 obtained in the present study should be interpreted with caution, although we have  
320 been extremely careful in selecting instruments to satisfy various model assumptions  
321 and have conducted extensive sensitivity analyses to guard against model assumption  
322 misspecifications. Second, also like other Mendelian randomization studies, we  
323 assumed a linear relationship between BMI and ALS in the Mendelian randomization  
324 model; while linearity may be not reasonable in the practice. Thus, we cannot fully  
325 rule out the possibility of nonlinear link between BMI and ALS. Third, due to the use  
326 of GWAS summary statistics rather than the individual-level data, we cannot test for  
327 the causal effect between BMI and ALS stratified by gender or age groups [13, 33].

328 In conclusion, based the Mendelian randomization results obtained from large-scale  
329 GWAS summary statistics, the present study is not supportive of the causal role of  
330 genetically increased or decreased BMI on the risk of ALS.

## 331 **Acknowledgements**

332 We thank all the GWAS consortium studies for making the summary data publicly  
333 available and are grateful of all the investigators and participants contributed to those  
334 studies.

## 335 **Funding Sources**

336 This study was supported by the National Natural Science Foundation of Jiangsu  
337 (BK20181472), Youth Foundation of Humanity and Social Science funded by  
338 Ministry of Education of China (18YJC910002), the China Postdoctoral Science  
339 Foundation (2018M630607), Jiangsu QingLan Research Project for Outstanding  
340 Young Teachers, the College Philosophy and Social Science Foundation from  
341 Education Department of Jiangsu (2018SJA0956), the Postdoctoral Science  
342 Foundation of Xuzhou Medical University, the National Natural Science Foundation  
343 of China (81402765), the Statistical Science Research Project from National Bureau  
344 of Statistics of China (2014LY112), and the Priority Academic Program Development  
345 of Jiangsu Higher Education Institutions (PAPD) for Xuzhou Medical University. The  
346 funder of the study had no role in study design, data collection, data analysis, data  
347 interpretation, or writing of the report. PZ and HX had full access to all the data in the  
348 study and had final responsibility for the decision to submit for publication.

## 349 **Declarations of interests**

350 The authors declare that they have nothing to disclose.

## 351 **Author contributions**

352 PZ and HX conceived the idea for the study. PZ and XY obtained the data, and  
353 performed the data analyses. PZ interpreted the results of the data analyses. All the  
354 authors wrote the manuscript.

## 355 **Supplementary data**

356 Supplementary File S1 and Supplementary File S2

## 357 REFERENCES

- 358 1. Kiernan, M. C., Vucic, S., Cheah, B. C., Turner, M. R., Eisen, A., Hardiman, O.,  
359 et al. 2011. Amyotrophic lateral sclerosis. *Lancet* 377(9769): 942-955.
- 360 2. Al-Chalabi, A. and Hardiman, O. 2013. The epidemiology of ALS: a conspiracy  
361 of genes, environment and time. *Nature Reviews Neurology* 9(11): 617-628.
- 362 3. van Rheenen, W., Shatunov, A., Dekker, A. M., McLaughlin, R. L., Diekstra, F. P.,  
363 Pulit, S. L., et al. 2016. Genome-wide association analyses identify new risk  
364 variants and the genetic architecture of amyotrophic lateral sclerosis. *Nat Genet*  
365 48(9): 1043-1048.
- 366 4. Nicolas, A., Kenna, K. P., Renton, A. E., Ticozzi, N., Faghri, F., Chia, R., et al.  
367 2018. Genome-wide Analyses Identify KIF5A as a Novel ALS Gene. *Neuron*  
368 97(6): 1268-1283.e1266.
- 369 5. Dupuis, L., Corcia, P., Fergani, A., Gonzalez De Aguilar, J.-L.,  
370 Bonnefont-Rousselot, D., Bittar, R., et al. 2008. Dyslipidemia is a protective  
371 factor in amyotrophic lateral sclerosis. *Neurology* 70(13): 1004-1009.
- 372 6. Chio, A., Calvo, A., Ilardi, A., Cavallo, E., Moglia, C., Mutani, R., et al. 2009.  
373 Lower serum lipid levels are related to respiratory impairment in patients with  
374 ALS. *Neurology* 73(20): 1681-1685.
- 375 7. Mitchell, J. D. and Borasio, G. D. 2007. Amyotrophic lateral sclerosis. *Lancet*  
376 369(9578): 2031-2041.
- 377 8. Corcia, P. and Meininger, V. 2008. Management of amyotrophic lateral sclerosis.  
378 *Drugs* 68(8): 1037-1048.
- 379 9. Malek, A. M., Barchowsky, A., Bowser, R., Heiman-Patterson, T., Lacomis, D.,  
380 Rana, S., et al. 2014. Environmental and Occupational Risk Factors for  
381 Amyotrophic Lateral Sclerosis: A Case-Control Study. *Neurodegenerative*  
382 *Diseases* 14(1): 31-38.
- 383 10. Andrew, A. S., Caller, T. A., Tandan, R., Duell, E. J., Henegan, P. L., Field, N., et  
384 al. 2017. Environmental and occupational exposures and amyotrophic lateral  
385 sclerosis (ALS) in New England. *NeuroDegenerative Diseases* 17(2-3): 110-116.
- 386 11. Wang, M. D., Little, J., Gomes, J., Cashman, N. R. and Krewski, D. 2017.  
387 Identification of risk factors associated with onset and progression of  
388 amyotrophic lateral sclerosis using systematic review and meta-analysis.  
389 *Neurotoxicology* 61: 101-130.
- 390 12. Arthur, K. C., Calvo, A., Price, T. R., Geiger, J. T., Chiò, A. and Traynor, B. J.  
391 2016. Projected increase in amyotrophic lateral sclerosis from 2015 to 2040. *Nat*  
392 *Commun* 7: 12408.
- 393 13. Peter, R. S., Rosenbohm, A., Dupuis, L., Brehme, T., Kassubek, J., Rothenbacher,  
394 D., et al. 2017. Life course body mass index and risk and prognosis of  
395 amyotrophic lateral sclerosis: results from the ALS registry Swabia. *Eur J*  
396 *Epidemiol* 32(10): 901-908.
- 397 14. Ioannides, Z. A., Ngo, S. T., Henderson, R. D., McCombe, P. A. and Steyn, F. J.  
398 2016. Altered Metabolic Homeostasis in Amyotrophic Lateral Sclerosis:  
399 Mechanisms of Energy Imbalance and Contribution to Disease Progression.  
400 *Neurodegenerative Diseases* 16(5-6): 382-397.
- 401 15. Desport, J. C., Preux, P. M., Magy, L., Boirie, Y., Vallat, J. M., Beaufriere, B., et al.  
402 2001. Factors correlated with hypermetabolism in patients with amyotrophic  
403 lateral sclerosis. *Am J Clin Nutr* 74(3): 328-334.
- 404 16. Desport, J.-C., Torny, F., Lacoste, M., Preux, P.-M. and Couratier, P. 2005.  
405 Hypermetabolism in ALS: Correlations with Clinical and Paraclinical Parameters.



- Neurodegenerative Diseases 2(3-4): 202-207.
17. Bouteloup, C., Desport, J. C., Clavelou, P., Guy, N., Derumeaux-Burel, H., Ferrier, A., et al. 2009. Hypermetabolism in ALS patients: an early and persistent phenomenon. *J Neurol* 256(8): 1236-1242.
18. Dupuis, L., Pradat, P.-F., Ludolph, A. C. and Loeffler, J.-P. 2011. Energy metabolism in amyotrophic lateral sclerosis. *Lancet Neurol* 10(1): 75-82.
19. Ahmed, R. M., Irish, M., Piguet, O., Halliday, G. M., Ittner, L. M., Farooqi, S., et al. 2016. Amyotrophic lateral sclerosis and frontotemporal dementia: distinct and overlapping changes in eating behaviour and metabolism. *Lancet Neurol* 15(3): 332-342.
20. Steyn, F. J., Ioannides, Z. A., van Eijk, R. P. A., Heggie, S., Thorpe, K. A., Ceslis, A., et al. 2018. Hypermetabolism in ALS is associated with greater functional decline and shorter survival. *J Neurol Neurosurg Psychiatry* 89(10): 1016-1023.
21. Paganoni, S., Deng, J., Jaffa, M., Cudkowicz, M. E. and Wills, A.-M. 2011. Body mass index, not dyslipidemia, is an independent predictor of survival in amyotrophic lateral sclerosis. *Muscle Nerve* 44(1): 20-24.
22. Reich-Slotky, R., Andrews, J., Cheng, B., Buchsbaum, R., Levy, D., Kaufmann, P., et al. 2013. Body mass index (BMI) as predictor of ALSFRS-R score decline in ALS patients. *Amyotrophic Lateral Sclerosis and Frontotemporal Degeneration* 14(3): 212-216.
23. O'Reilly, É. J., Wang, H., Weisskopf, M. G., Fitzgerald, K. C., Falcone, G., McCullough, M. L., et al. 2013. Premorbid body mass index and risk of amyotrophic lateral sclerosis. *Amyotrophic Lateral Sclerosis and Frontotemporal Degeneration* 14(3): 205-211.
24. Desport, J., Preux, P., Truong, T., Vallat, J., Sautereau, D. and Couratier, P. 1999. Nutritional status is a prognostic factor for survival in ALS patients. *Neurology* 53(5): 1059-1059.
25. Shimizu, T., Nagaoka, U., Nakayama, Y., Kawata, A., Kugimoto, C., Kuroiwa, Y., et al. 2012. Reduction rate of body mass index predicts prognosis for survival in amyotrophic lateral sclerosis: a multicenter study in Japan. *Amyotroph Lateral Scler* 13(4): 363-366.
26. Calvo, A., Moglia, C., Lunetta, C., Marinou, K., Ticozzi, N., Ferrante, G. D., et al. 2017. Factors predicting survival in ALS: a multicenter Italian study. *J Neurol* 264(1): 54-63.
27. Jawaid, A., Murthy, S. B., Wilson, A. M., Qureshi, S. U., Amro, M. J., Wheaton, M., et al. 2010. A decrease in body mass index is associated with faster progression of motor symptoms and shorter survival in ALS. *Amyotroph Lateral Scler* 11(6): 542-548.
28. Wills, A.-M., Hubbard, J., Macklin, E. A., Glass, J., Tandan, R., Simpson, E. P., et al. 2014. Hypercaloric enteral nutrition in patients with amyotrophic lateral sclerosis: a randomised, double-blind, placebo-controlled phase 2 trial. *Lancet* 383(9934): 2065-2072.
29. Mattson, M. P., Cutler, R. G. and Camandola, S. 2007. Energy intake and amyotrophic lateral sclerosis. *Neuromolecular Med* 9(1): 17-20.
30. Kellogg, J., Bottman, L., Arra, E. J., Selkirk, S. M. and Kozlowski, F. 2018. Nutrition management methods effective in increasing weight, survival time and functional status in ALS patients: a systematic review. *Amyotroph Lateral Scler Frontotemporal Degener* 19(1-2): 7-11.
31. Dupuis, L., Oudart, H., René, F., de Aguilar, J.-L. G. and Loeffler, J.-P. 2004. Evidence for defective energy homeostasis in amyotrophic lateral sclerosis:



- benefit of a high-energy diet in a transgenic mouse model. *Proceedings of the National Academy of Sciences* 101(30): 11159-11164.
32. Scarmeas, N., Shih, T., Stern, Y., Ottman, R. and Rowland, L. P. 2002. Premorbid weight, body mass, and varsity athletics in ALS. *Neurology* 59(5): 773-775.
33. Gallo, V., Wark, P. A., Jenab, M., Pearce, N., Brayne, C., Vermeulen, R., et al. 2013. Prediagnostic body fat and risk of death from amyotrophic lateral sclerosis The EPIC cohort. *Neurology* 80(9): 829-838.
34. Huisman, M. H. B., Seelen, M., van Doormaal, P. T. C., de Jong, S. W., de Vries, J. H. M., van der Kooi, A. J., et al. 2015. Effect of Presymptomatic Body Mass Index and Consumption of Fat and Alcohol on Amyotrophic Lateral Sclerosis. *JAMA Neurology* 72(10): 1155-1162.
35. Mariosa, D., Beard, J. D., Umbach, D. M., Bellocchio, R., Keller, J., Peters, T. L., et al. 2017. Body Mass Index and Amyotrophic Lateral Sclerosis: A Study of US Military Veterans. *Am J Epidemiol* 185(5): 362-371.
36. Sutedja, N. A., van der Schouw, Y. T., Fischer, K., Sizoo, E. M., Huisman, M. H. B., Veldink, J. H., et al. 2011. Beneficial vascular risk profile is associated with amyotrophic lateral sclerosis. *J Neurol Neurosurg Psychiatry* 82(6): 638-642.
37. Nelson, L. M., Matkin, C., Longstreth, J. W. T. and McGuire, V. 2000. Population-Based Case-Control Study of Amyotrophic Lateral Sclerosis in Western Washington State. II. Diet. *Am J Epidemiol* 151(2): 164-173.
38. Nelson, L. M., McGuire, V., Longstreth, J. W. T. and Matkin, C. 2000. Population-Based Case-Control Study of Amyotrophic Lateral Sclerosis in Western Washington State. I. Cigarette Smoking and Alcohol Consumption. *Am J Epidemiol* 151(2): 156-163.
39. Collaborators, T. G. O. 2017. Health Effects of Overweight and Obesity in 195 Countries over 25 Years. *N Engl J Med* 377(1): 13-27.
40. Armon, C. 2003. An Evidence-Based Medicine Approach to the Evaluation of the Role of Exogenous Risk Factors in Sporadic Amyotrophic Lateral Sclerosis. *Neuroepidemiology* 22(4): 217-228.
41. Marin, B., Fontana, A., Arcuti, S., Copetti, M., Boumediene, F., Couratier, P., et al. 2018. Age-specific ALS incidence: a dose-response meta-analysis. *Eur J Epidemiol* 33(7): 621-634.
42. Marin, B., Boumédiene, F., Logroscino, G., Couratier, P., Babron, M.-C., Leutenegger, A. L., et al. 2017. Variation in worldwide incidence of amyotrophic lateral sclerosis: a meta-analysis. *Int J Epidemiol* 46(1): 57-74.
43. Logroscino, G., Beghi, E., Zoccolella, S., Palagano, R., Fraddosio, A., Simone, I. L., et al. 2005. Incidence of amyotrophic lateral sclerosis in southern Italy: a population based study. *J Neurol Neurosurg Psychiatry* 76(8): 1094-1098.
44. Gordon, P. H. 2013. Incidence of amyotrophic lateral sclerosis among American Indians and Alaska natives. *JAMA Neurology* 70(4): 476-480.
45. Angrist, J. D., Imbens, G. W. and Rubin, D. B. 1996. Identification of Causal Effects Using Instrumental Variables. *J Am Stat Assoc* 91(434): 444-455.
46. Greenland, S. 2000. An introduction to instrumental variables for epidemiologists. *Int J Epidemiol* 29: 722-729.
47. Sheehan, N. A., Didelez, V., Burton, P. R. and Tobin, M. D. 2008. Mendelian randomisation and causal inference in observational epidemiology. *PLoS Med* 5(8): e177.
48. Visscher, P. M., Wray, N. R., Zhang, Q., Sklar, P., McCarthy, M. I., Brown, M. A., et al. 2017. 10 Years of GWAS Discovery: Biology, Function, and Translation. *Am J Hum Genet* 101(1): 5-22.

- 506 49. Welter, D., MacArthur, J., Morales, J., Burdett, T., Hall, P., Junkins, H., et al.  
507 2014. The NHGRI GWAS Catalog, a curated resource of SNP-trait associations.  
508 *Nucleic Acids Res* 42(D1): D1001-D1006.
- 509 50. Yengo, L., Sidorenko, J., Kemper, K. E., Zheng, Z., Wood, A. R., Weedon, M. N.,  
510 et al. 2018. Meta-analysis of genome-wide association studies for height and  
511 body mass index in ~700000 individuals of European ancestry. *Hum Mol Genet*:  
512 10.1093/hmg/ddy1271.
- 513 51. Locke, A. E., Kahali, B., Berndt, S. I., Justice, A. E., Pers, T. H., Day, F. R., et al.  
514 2015. Genetic studies of body mass index yield new insights for obesity biology.  
515 *Nature* 518(7538): 197-206.
- 516 52. Akiyama, M., Okada, Y., Kanai, M., Takahashi, A., Momozawa, Y., Ikeda, M., et  
517 al. 2017. Genome-wide association study identifies 112 new loci for body mass  
518 index in the Japanese population. *Nat Genet* 49(10): 1458-1467.
- 519 53. Paternoster, L., Tilling, K. and Davey Smith, G. 2017. Genetic epidemiology and  
520 Mendelian randomization for informing disease therapeutics: Conceptual and  
521 methodological challenges. *PLoS Genet* 13(10): e1006944.
- 522 54. Sleiman, P. M. and Grant, S. F. 2010. Mendelian randomization in the era of  
523 genomewide association studies. *Clin Chem* 56(5): 723-728.
- 524 55. Davies, N. M., Holmes, M. V. and Davey Smith, G. 2018. Reading Mendelian  
525 randomisation studies: a guide, glossary, and checklist for clinicians. *Br Med J*  
526 362.
- 527 56. Benyamin, B., He, J., Zhao, Q., Gratten, J., Garton, F., Leo, P. J., et al. 2017.  
528 Cross-ethnic meta-analysis identifies association of the GPX3-TNIP1 locus with  
529 amyotrophic lateral sclerosis. *Nat Commun* 8(1): 611.
- 530 57. Shim, H., Chasman, D. I., Smith, J. D., Mora, S., Ridker, P. M., Nickerson, D. A.,  
531 et al. 2015. A Multivariate Genome-Wide Association Analysis of 10 LDL  
532 Subfractions, and Their Response to Statin Treatment, in 1868 Caucasians. *PLoS*  
533 *ONE* 10(4): e0120758.
- 534 58. Cragg, J. G. and Donald, S. G. 1993. Testing Identifiability and Specification in  
535 Instrumental Variable Models. *Econometric Theory* 9(2): 222-240.
- 536 59. Burgess, S., Small, D. S. and Thompson, S. G. 2017. A review of instrumental  
537 variable estimators for Mendelian randomization. *Stat Methods Med Res* 26(5):  
538 2333-2355.
- 539 60. Yavorska, O. O. and Burgess, S. 2017. MendelianRandomization: an R package  
540 for performing Mendelian randomization analyses using summarized data. *Int J*  
541 *Epidemiol*: dyx034.
- 542 61. Bowden, J., Del Greco M, F., Minelli, C., Davey Smith, G., Sheehan, N. A. and  
543 Thompson, J. R. 2016. Assessing the suitability of summary data for two-sample  
544 Mendelian randomization analyses using MR-Egger regression: the role of the  $I^2$   
545 statistic. *Int J Epidemiol* 45(6): 1961-1974.
- 546 62. Hartwig, F. P., Davey Smith, G. and Bowden, J. 2017. Robust inference in  
547 summary data Mendelian randomization via the zero modal pleiotropy  
548 assumption. *Int J Epidemiol* 46(6): 1985-1998.
- 549 63. Noyce, A. J., Kia, D. A., Hemani, G., Nicolas, A., Price, T. R., De  
550 Pablo-Fernandez, E., et al. 2017. Estimating the causal influence of body mass  
551 index on risk of Parkinson disease: A Mendelian randomisation study. *PLoS Med*  
552 14(6): e1002314.
- 553 64. Verbanck, M., Chen, C.-Y., Neale, B. and Do, R. 2018. Detection of widespread  
554 horizontal pleiotropy in causal relationships inferred from Mendelian  
555 randomization between complex traits and diseases. *Nat Genet* 50(5): 693-698.

- 556 65. Bowden, J., Davey Smith, G., Haycock, P. C. and Burgess, S. 2016. Consistent  
557 estimation in Mendelian randomization with some invalid instruments using a  
558 weighted median estimator. *Genet Epidemiol* 40(4): 304-314.
- 559 66. Burgess, S. and Thompson, S. G. 2017. Interpreting findings from Mendelian  
560 randomization using the MR-Egger method. *Eur J Epidemiol* 32(5): 377-389.
- 561 67. Brion, M.-J. A., Shakhbazov, K. and Visscher, P. M. 2013. Calculating statistical  
562 power in Mendelian randomization studies. *Int J Epidemiol* 42(5): 1497-1501.
- 563 68. Kioumourtoglou, M., Rotem, R. S., Seals, R. M., Gredal, O., Hansen, J. and  
564 Weisskopf, M. G. 2015. Diabetes mellitus, obesity, and diagnosis of amyotrophic  
565 lateral sclerosis: A population-based study. *JAMA Neurology* 72(8): 905-911.
- 566 69. Haycock, P. C., Burgess, S., Wade, K. H., Bowden, J., Relton, C. and Smith, G. D.  
567 2016. Best (but oft-forgotten) practices: the design, analysis, and interpretation of  
568 Mendelian randomization studies. *Am J Clin Nutr* 103(4): 965-978.
- 569 70. D'Ovidio, F., d'Errico, A., Carna, P., Calvo, A., Costa, G. and Chio, A. 2018. The  
570 role of pre-morbid diabetes on developing amyotrophic lateral sclerosis. *Eur J*  
571 *Neurol* 25(1): 164-170.
- 572 71. Moglia, C., Calvo, A., Canosa, A., Bertuzzo, D., Cugnasco, P., Solero, L., et al.  
573 2017. Influence of arterial hypertension, type 2 diabetes and cardiovascular risk  
574 factors on ALS outcome: a population-based study. *Amyotrophic Lateral*  
575 *Sclerosis and Frontotemporal Degeneration* 18(7-8): 590-597.
- 576 72. Visser, A. E., Seelen, M., Hulsbergen, A., de Graaf, J., van der Kooi, A. J.,  
577 Raaphorst, J., et al. 2017. Exploring the fitness hypothesis in ALS: a  
578 population-based case-control study of parental cause of death and lifespan. *J*  
579 *Neurol Neurosurg Psychiatry* 88(7): 550-556.
- 580 73. Mitchell, C. S., Hollinger, S. K., Goswami, S. D., Polak, M. A., Lee, R. H. and  
581 Glass, J. D. 2015. Antecedent Disease Is Less Prevalent in Amyotrophic Lateral  
582 Sclerosis. *Neurodegenerative Diseases* 15(2): 109-113.
- 583 74. Kioumourtoglou, M.-A., Rotem, R. S., Seals, R. M., Gredal, O., Hansen, J. and  
584 Weisskopf, M. G. 2015. Diabetes Mellitus, Obesity, and Diagnosis of  
585 Amyotrophic Lateral Sclerosis: A Population-Based Study. *JAMA Neurology*  
586 72(8): 905-911.
- 587 75. Jawaid, A., Salamone, A. R., Strutt, A. M., Murthy, S. B., Wheaton, M.,  
588 McDowell, E. J., et al. 2010. ALS disease onset may occur later in patients with  
589 pre-morbid diabetes mellitus. *Eur J Neurol* 17(5): 733-739.
- 590 76. Qu, H., Deng, H. and Hu, Z. 2013. Plasma progranulin concentrations are  
591 increased in patients with type 2 diabetes and obesity and correlated with insulin  
592 resistance. *Mediators Inflamm* 2013: 360190-360190.
- 593 77. Laird, A. S., Van Hoecke, A., De Muynck, L., Timmers, M., Van Den Bosch, L.,  
594 Van Damme, P., et al. 2010. Progranulin is Neurotrophic In Vivo and Protects  
595 against a Mutant TDP-43 Induced Axonopathy. *PLoS ONE* 5(10): e13368.
- 596
- 597

# Figure Legends and Tables

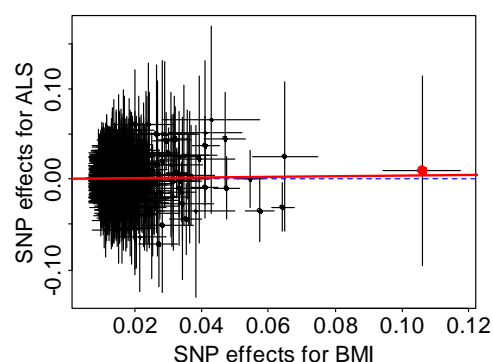

599

600 **Fig. 1.** Relationship between the SNP effect size estimates of BMI (x-axis) and the  
601 corresponding effect size estimates of ALS (y-axis) in the European population using  
602 1,031 instruments generated from [50]. In the plot, the 95% CIs for the effect sizes of  
603 instruments on BMI are shown as horizontal lines, while the 95% CIs for the effect  
604 sizes of instruments on ALS are shown as vertical lines. The horizontal dotted line  
605 represents zero effects. The line in red represents the estimated causal effect of BMI  
606 on ALS obtained using the random-effects IVW method. The red dot in the rightmost  
607 side is identified as an outlier (i.e. rs2229616).

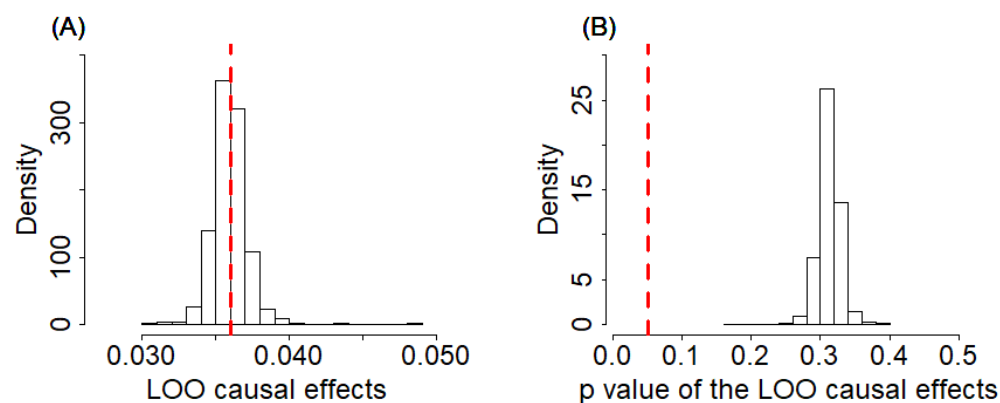

608

609 **Fig. 2.** Leave-one-out (LOO) results of BMI on ALS based on the set of 1,091  
610 instruments in the European population. (A) Estimated LOO causal effects; (B) The p  
611 values of the LOO causal effects. In the left panel, the red reference line is the point  
612 estimate of causal effect for BMI using all the instruments; in the right panel, the red  
613 reference line represents the significance level of 0.05.

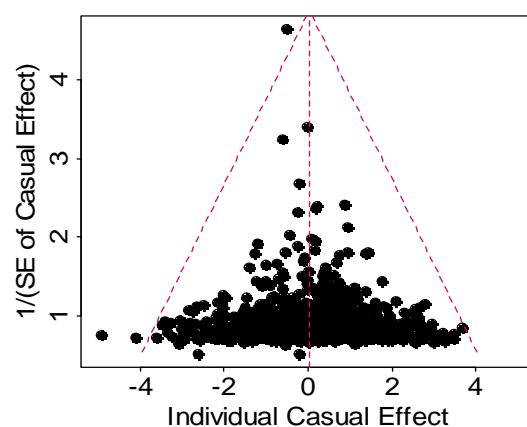

614

615 **Fig. 3.** Funnel plot for single causal effect estimate of BMI on ALS obtained using all  
 616 1,091 instruments in the European population.

617 **Table 1**

618 GWAS data sets used in the Mendelian randomization analysis in the main text.

| Traits | PubMed ID | Population | $k$   | Sample size | Data source                 |
|--------|-----------|------------|-------|-------------|-----------------------------|
| BMI    | 30124842  | European   | 1,031 | 773,253     | GIANT [50]                  |
| ALS    | 29566793  | European   |       | 80,610      | Nicolas, et al (2018) [4]   |
| BMI    | 28892062  | East Asian | 75    | 158,284     | BioBank Japan [52]          |
| ALS    | 28931804  | East Asian |       | 4,084       | Benyamin, et al (2017) [56] |

619 BMI: body mass index; ALS: amyotrophic lateral sclerosis;  $k$  is the number of  
 620 instruments.
